# Supplementary material for: Neutrophil-to-Lymphocyte Ratio and Platelet-to-Lymphocyte Ratio as Prognostic Markers for Advanced Non-Small-Cell Lung Cancer Treated with Immunotherapy: A Systematic Review and Meta-Analysis
Source: Medicina (Kaunas). 2022 Aug 8;58(8):1069. doi: 10.3390/medicina58081069 (PMC9413376; doi:10.3390/medicina58081069)
Supplement: Supplementary file 1 [file medicina-58-01069-s001.zip › Supplementary File S2_Risk of bias.pdf]

## Supplementary file S2

| Studies          | Selection | Comparability | Outcome | Total        |
|------------------|-----------|---------------|---------|--------------|
| Katayama et al.  | ☆☆☆☆      | ☆☆            | ☆-☆     | 8 – Good     |
| Suh et al.       | ☆☆☆☆      | ☆☆            | ☆☆☆     | 9 – Good     |
| Khunger et al.   | ☆☆☆☆      | ☆☆            | ☆☆☆     | 9 – Good     |
| Nakaya et al.    | ☆☆-☆      | ☆☆            | --☆     | 6 – Moderate |
| Russo et al.     | ☆☆☆☆      | ☆☆            | ☆-☆     | 8 – Good     |
| Svaton et al.    | ☆☆☆☆      | -☆            | ☆-☆     | 7 – Good     |
| Takeda et al.    | ☆☆☆☆      | -☆            | ☆-☆     | 7 – Good     |
| Zer et al.       | ☆☆☆☆      | -☆            | ☆☆☆     | 8 – Good     |
| Pavan et al.     | ☆☆☆☆      | -☆            | ☆-☆     | 7 – Good     |
| Matsubara et al. | ☆☆☆☆      | ☆☆            | ☆-☆     | 8 – Good     |
| Prelaj et al.    | ☆☆☆☆      | -☆            | ☆-☆     | 7 – Good     |
| Russo et al.     | ☆☆☆☆      | ☆☆            | ☆-☆     | 8 – Good     |
| Zer et al.       | ☆☆☆☆      | ☆☆            | ☆-☆     | 8 – Good     |
| Yang et al       | ☆☆☆☆      | -☆            | ☆-☆     | 7 – Good     |
| Ksienski et al   | ☆☆☆☆      | -☆            | ☆☆☆     | 8 – Good     |
